# Supplementary material for: Possible scenario of forming a catalyst layer for proton exchange membrane fuel cells
Source: Royal Society of Chemistry journal article supplement (doi:10.1039/c9ra09864j), 2020-01-01
Supplement: c9ra09864j1.pdf [file c9ra09864j1.pdf]

## Possible Scenario of Forming the Catalyst Layer for Proton Exchange Membrane Fuel Cells

Rong Zeng<sup>abc\*</sup>, Hongyu Zhang<sup>abc</sup>, Sizhe Liang<sup>abc</sup>, Ligeng Wang<sup>ac</sup>, Lijun Jiang<sup>abc</sup>,

Xiaopeng Liu<sup>abc</sup>

a GRINM Group Co. Ltd, No.2 Xijiekouwai Street, Xicheng Dist., Beijing, P.R. China, 100088.

b National Engineering Research Center of Nonferrous Metals Materials and Products for New Energy, No.2 Xijiekouwai Street, Beijing, 100088

c GRIMAT Engineering Institute Co., Ltd., No.11 Xingkedong Street, Huairou Dist. Beijing, P.R. China, 101407.

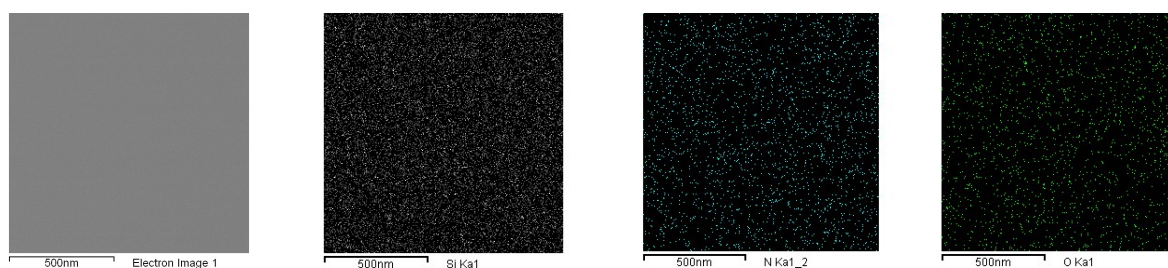

Fig S1. HAADF images and EDX maps with colored pixels

Si is grey; N is blue; O is green

The EDX mapping of the original SiN grid shows that Si, N and O were homogeneously distributed. Only Si, N, O and Cl are the detected. The SiN grid is free of the concerned C, F, S, Pt.

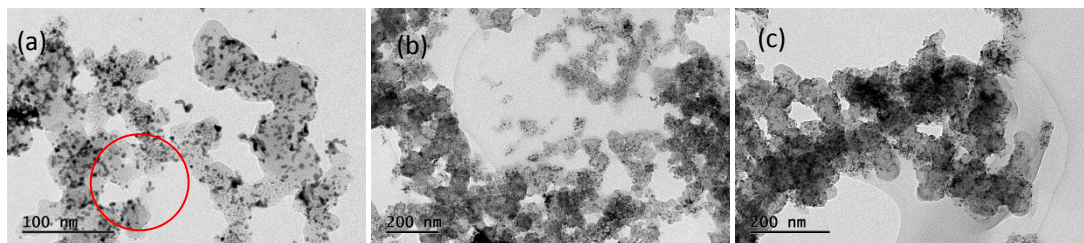

Fig. S2 TEM of catalyst with ionomer in (a) H<sup>+</sup>, (b) Al<sup>3+</sup> and (c) Cu<sup>2+</sup> form

It is hardly to discern the ionomer film in H<sup>+</sup> from the SiN background as shown in Fig S2 (a). The possible ionomer film in H<sup>+</sup> form was highlighted by the red circle. However, one can clearly discern the ionomer film in Al<sup>3+</sup> and Cu<sup>2+</sup> form from the SiN background. The AFM images of the catalyst layer show the ionomer thin film covered the aggregated Pt/C catalyst in different thickness.<sup>1-8</sup> The ionomer doesn't cover the catalyst in an aggregated state as expected but form thin film among the aggregated catalyst.

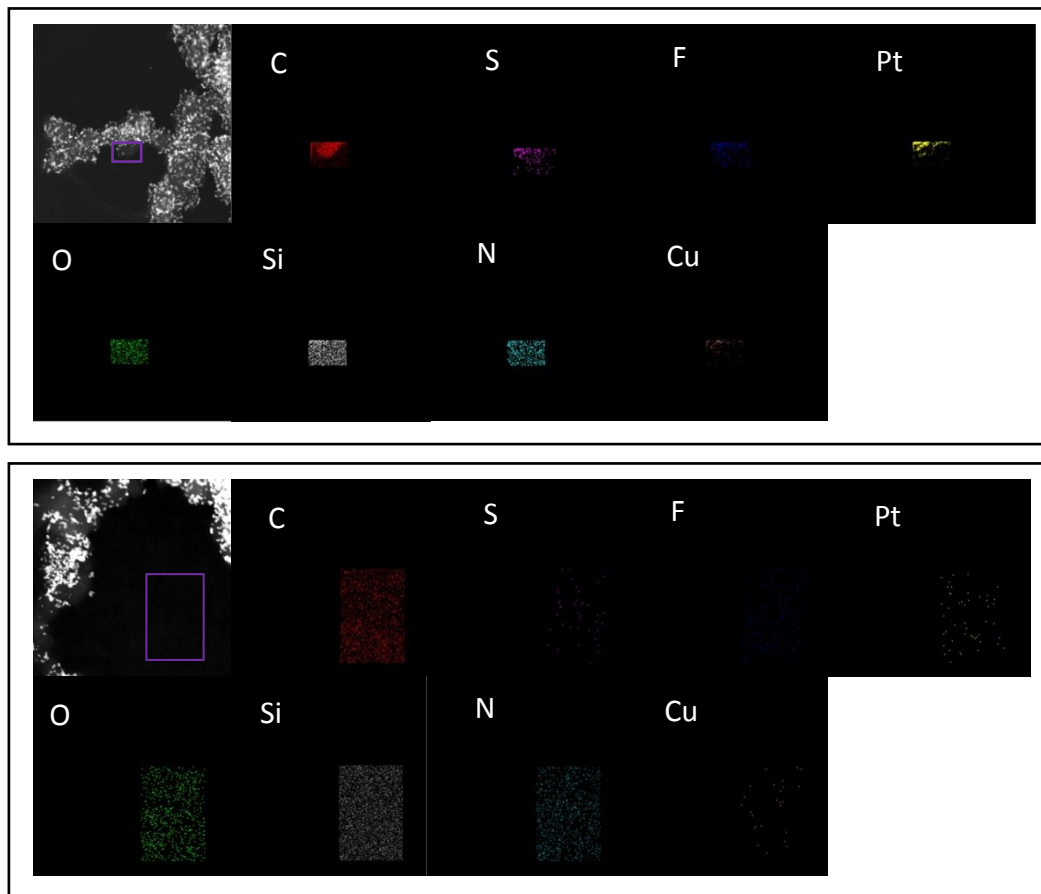

Fig. S3 HAADF images (where the purple rectangle show the mapping area) and EDX maps with colored pixels indicating where the element was detected above background in the area of the catalyst with ionomer in  $\text{Cu}^{2+}$  (the upper images) and away from the catalyst (the lower images). C is red; S is purple; F is blue; Pt is yellow; O is green; Si is grey; N is cyan. It clearly showed that S appeared at the position where Pt was.

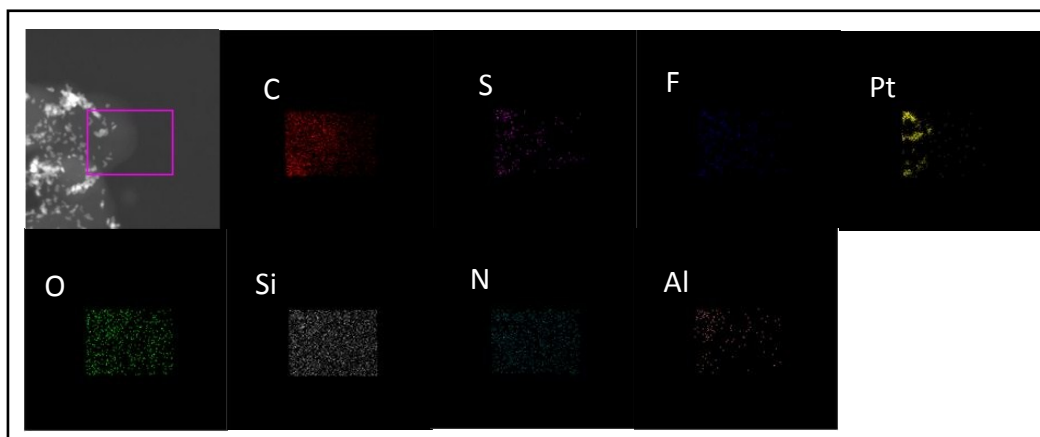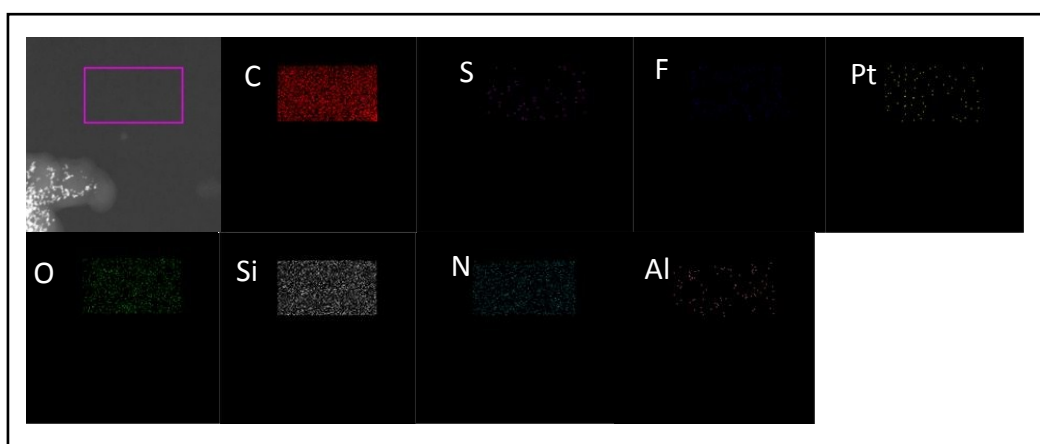

Fig. S4 HAADF images (where the purple rectangle show the mapping area) and EDX maps with colored pixels indicating where the element was detected above background in the area of the catalyst with ionomer in  $\text{Al}^{3+}$  (the upper images) and away from the catalyst (the lower images). C is red; S is purple; F is blue; Pt is yellow; O is green; Si is grey; N is cyan. It clearly showed that S appeared at the position where Pt was.

Table S1. Elemental content in the area of the catalyst and away from the catalyst using ionomer in Al<sup>3+</sup>, Cu<sup>2+</sup>

|         | Catalyst/in Al <sup>3+</sup> | Away catalyst/in Al <sup>3+</sup> | catalyst/in Cu <sup>2+</sup> | Away catalyst/in Cu <sup>2+</sup> |
|---------|------------------------------|-----------------------------------|------------------------------|-----------------------------------|
| C(at%)  | 89.39                        | 83.88                             | 92.39                        | 83.24                             |
| Pt(at%) | 0.63                         | -                                 | 0.95                         | 0.01                              |
| S(at%)  | 0.11                         | -                                 | 0.12                         | 0.03                              |
| F(at%)  | 0.06                         | -                                 | 0.15                         | 0.38                              |
| O(at%)  | 2.49                         | 3.99                              | 1.31                         | 2.17                              |
| Si(at%) | 7.27                         | 12.04                             | 4.93                         | 14.15                             |
| N(at%)  | -                            | -                                 | -                            | -                                 |
| Cl(at%) | -                            | -                                 | -                            | -                                 |
| Al(at%) | 0.05                         | 0.09                              | -                            | -                                 |
| Cu(at%) |                              |                                   | 0.15                         | 0.01                              |

## References

1. R. Hiesgen, T. Morawietz, M. Handl, M. Corasaniti, K. A. Friedrich, *Electrochimica Acta*, 2015, **162**, 86.
2. T. Morawietz, M. Handl, M. Simolka, K. A. Friedrich, R. Hiesgen, *ECS Trans.*, 2015, **68(3)**, 3.
3. T. Morawietz, M. Handl, C. Oldani, K. A. Friedrich, R. Hiesgen, *ACS Appl. Mater. Interfaces*, 2016, **8(40)**, 27044.
4. R. Hiesgen, T. Morawietz, M. Handl, K. A. Friedrich, *Mater. Res. Soc. Symp. Proc.*, 2015, **1774**, 19.
5. T. Morawietz, M. Handl, C. Oldani, K. A. Friedrich, R. Hiesgen, *Fuel Cells*, 2018, **18(3)**, 239.
6. T. Morawietz, M. Handl, K. A. Friedrich, R. Hiesgen, *ECS Trans.*, 2018, **86(13)**, 179.
7. T. Morawietz, M. Handl, C. Oldani, P. Gazdzicki, J. Hunger, F. Wilhelm, J. Blake, K. A. Friedrich, R. Hiesgen, *J. Electrochem. Soc.*, 2018, **165(6)**, F3139.
8. D. A. Cullen, R. Koestner, R. S. Kukreja, Z. Y. Liu, S. Minko, O. Trotsenko, A. Tokarev, L. Guetaz, H. M. Meyer, C. M. Parish, K. L. More, *J. Electrochem. Soc.*, 2014, **161(10)**, F1111.
